# Supplementary material for: Income Changes Due to Disability Ratings and Participation in Economic Activities Caused by Industrial Accidents: A Population-Based Study of Data from the Fourth Panel Study of Workers’ Compensation Insurance (PSWCI)
Source: PubMed Central journal article supplement (PMC6266137; doi:10.3390/ijerph15112478), 2018-11-06
Supplement: ijerph-15-02478-s001.pdf [file ijerph-15-02478-s001.pdf]

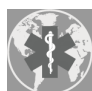

**Table S1.** Relationship between disability rating and total earned annual income changes before and after industrial accident (unit: million KRW).

|                         | Income before     |       | 1st (2012) * | 2nd (2013) * | 3rd (2014) * | 4th (2015) | <i>p</i> -Value ‡ | 1st–4th      |       | <i>p</i> -Value § |       |       |
|-------------------------|-------------------|-------|--------------|--------------|--------------|------------|-------------------|--------------|-------|-------------------|-------|-------|
|                         | Industrial        |       |              |              |              |            |                   | 2012–2015) † |       |                   |       |       |
|                         | Accident (2012) * |       | Mean         | SD           | Mean         | SD         | Mean              | SD           | Mean  | SD                |       |       |
| Disability rating       |                   |       |              |              |              |            | <0.0001           |              |       | 0.0373            |       |       |
| 1–3 ( <i>N</i> = 6)     | 29.93             | 7.82  | 2.06         | 5.05         | 3.22         | 7.89       | 3.09              | 7.57         | 3.00  | 7.35              | 2.84  | 6.96  |
| 4–7 ( <i>N</i> = 55)    | 32.34             | 15.18 | 8.47         | 11.53        | 12.99        | 15.44      | 13.66             | 14.72        | 15.26 | 14.17             | 12.60 | 12.13 |
| 8–10 ( <i>N</i> = 280)  | 30.35             | 13.09 | 10.44        | 12.88        | 18.83        | 18.37      | 19.29             | 16.72        | 20.33 | 16.19             | 17.22 | 13.73 |
| 11–14 ( <i>N</i> = 922) | 30.73             | 14.40 | 13.27        | 13.60        | 22.05        | 17.43      | 22.77             | 16.80        | 23.56 | 15.96             | 20.41 | 14.17 |
| None ( <i>N</i> = 275)  | 27.54             | 13.80 | 17.11        | 14.71        | 22.31        | 15.61      | 21.84             | 15.76        | 22.96 | 16.23             | 21.05 | 14.04 |

\* All adjusted to fit the wages of 2015. † Average of the first to fourth-year income. ‡ Analyses were done by using Repeated measures ANOVA. § Analyses were done annual income before industrial accident and the average of the first to fourth-year annual income by using Repeated measures ANOVA.

**Table S2.** Relationship between disability rating and total non-work annual income changes before and after industrial accident (unit: million KRW).

|                         | Income before     |       | 1st (2012) * | 2nd (2013) * | 3rd (2014) * | 4th (2015) | <i>p</i> -Value ‡ | 1st–4th      |       | <i>p</i> -Value § |       |       |
|-------------------------|-------------------|-------|--------------|--------------|--------------|------------|-------------------|--------------|-------|-------------------|-------|-------|
|                         | Industrial        |       |              |              |              |            |                   | 2012–2015) † |       |                   |       |       |
|                         | Accident (2012) * |       | Mean         | SD           | Mean         | SD         | Mean              | SD           | Mean  | SD                |       |       |
| Disability rating       |                   |       |              |              |              |            | <0.0001           |              |       | <0.0001           |       |       |
| 1–3 ( <i>N</i> = 6)     | 29.93             | 7.82  | 40.72        | 39.30        | 18.94        | 9.56       | 16.92             | 3.69         | 18.21 | 2.34              | 23.70 | 11.79 |
| 4–7 ( <i>N</i> = 55)    | 32.34             | 15.18 | 44.00        | 34.11        | 9.14         | 9.32       | 9.35              | 9.32         | 11.17 | 10.55             | 18.41 | 8.48  |
| 8–10 ( <i>N</i> = 280)  | 30.35             | 13.09 | 41.12        | 19.62        | 4.20         | 11.24      | 0.89              | 2.36         | 1.12  | 2.80              | 11.83 | 5.74  |
| 11–14 ( <i>N</i> = 922) | 30.73             | 14.40 | 20.02        | 13.87        | 2.17         | 5.45       | 0.80              | 3.10         | 0.84  | 2.61              | 5.96  | 4.16  |
| None ( <i>N</i> = 275)  | 27.54             | 13.80 | 5.39         | 6.91         | 1.55         | 8.22       | 0.73              | 2.65         | 1.00  | 4.50              | 2.17  | 4.07  |

\* All adjusted to fit the wages of 2015. † Average of the first to fourth-year income. ‡ Analyses were done by using Repeated measures ANOVA. § Analyses were done annual income before industrial accident and the average of the first to fourth-year annual income by using Repeated measures ANOVA.
